# Supplementary material for: Staff–pupil SARS-CoV-2 infection pathways in schools in Wales: a population-level linked data approach
Source: PubMed Central journal article supplement — BMJ Paediatr Open. 2021 May 10;5(1):e001049. doi: 10.1136/bmjpo-2021-001049 (PMC8111870; doi:10.1136/bmjpo-2021-001049), 2021-05-10
Supplement: bmjpo-2021-001049supp001.pdf [file bmjpo-2021-001049supp001.pdf]

| Exposure variable<br>(within last 14 days)                           | Model UA 1<br>(unadjusted)<br>n = 83,004 | Model UA 2<br>(unadjusted)<br>n = 83,004 | Model UA 3<br>(unadjusted)<br>n = 83,004 | Model UA 4<br>(unadjusted)<br>n = 69,461 | Model UA 5<br>(unadjusted)<br>n = 69,461 | Model UA 6<br>(unadjusted)<br>n = 83,004 | Model UA 7<br>(unadjusted)<br>n = 83,004 |
|----------------------------------------------------------------------|------------------------------------------|------------------------------------------|------------------------------------------|------------------------------------------|------------------------------------------|------------------------------------------|------------------------------------------|
| Count of cases within own household                                  | 8.20***<br>(8.19 – 8.81)                 |                                          |                                          |                                          |                                          |                                          |                                          |
| Count of staff member cases within the linked school                 |                                          | 1.17***<br>(1.16 – 1.18)                 |                                          |                                          |                                          |                                          |                                          |
| Count of pupil cases within the linked school                        |                                          |                                          | 1.12***<br>(1.11 – 1.12)                 |                                          |                                          |                                          |                                          |
| Count of pupil cases within the linked school (non-year group)       |                                          |                                          |                                          | 1.19***<br>(1.18 – 1.20)                 |                                          |                                          |                                          |
| Count of pupil cases in the linked school within the same year group |                                          |                                          |                                          |                                          | 1.48***<br>(1.45 – 1.50)                 |                                          |                                          |
| Count of cases in staff member's homes linked to the school.         |                                          |                                          |                                          |                                          |                                          | 1.47***<br>(1.16 – 1.18)                 |                                          |
| Count of cases in pupils' homes linked to the school.                |                                          |                                          |                                          |                                          |                                          |                                          | 1.09***<br>(1.08 – 1.09)                 |

Table S1 – Odds ratios of Univariate models for exposure variables. Signif. codes: 0 '\*\*\*' 0.001 '\*\*' 0.01 '\*' 0.05 '.' 0.1 ' ' 1.

Table S2 – Odds ratios of Univariate models for confounder variables.

| Confounder Variable | Category    | MS1<br>(n = 83,004)   | MS2<br>(n = 83,004) | MS3<br>(n = 83,004) | MS4<br>(n = 83,004) | MS5<br>(n = 83,004) | MS6<br>(n = 83,004) | MS7<br>(n = 83,004) | MS9<br>(n = 83,004) | MS10<br>(n = 83,004)  |
|---------------------|-------------|-----------------------|---------------------|---------------------|---------------------|---------------------|---------------------|---------------------|---------------------|-----------------------|
| Age Group           | 0 - 4 (ref) |                       |                     |                     |                     |                     |                     |                     |                     |                       |
|                     | 0 - 9       | 1.62*** (1.47 - 1.78) |                     |                     |                     |                     |                     |                     |                     | 1.57*** (1.43 - 1.73) |
|                     | 10 - 14     | 2.49*** (2.27 - 2.73) |                     |                     |                     |                     |                     |                     |                     | 2.69*** (2.40 - 3.02) |
|                     | 15 - 19     | 3.63*** (3.15 - 4.19) |                     |                     |                     |                     |                     |                     |                     | 3.84*** (3.25 - 4.53) |
|                     | 20 - 24     | 5.16*** (4.20 - 6.34) |                     |                     |                     |                     |                     |                     |                     | 2.18** (1.28 - 3.71)  |
|                     | 25 - 29     | 4.60*** (3.96 - 5.34) |                     |                     |                     |                     |                     |                     |                     | 2.16** (1.29 - 3.34)  |
|                     | 30 - 34     | 4.55*** (3.96 - 5.24) |                     |                     |                     |                     |                     |                     |                     | 2.01** (1.21 - 3.08)  |
|                     | 35 - 39     | 4.41*** (3.82 - 5.24) |                     |                     |                     |                     |                     |                     |                     | 1.85* (1.11 - 3.08)   |
|                     | 40 - 44     | 5.59*** (4.77 - 6.25) |                     |                     |                     |                     |                     |                     |                     | 2.23** (1.34 - 3.71)  |
|                     | 45 - 49     | 5.58*** (4.89 - 6.39) |                     |                     |                     |                     |                     |                     |                     | 2.39*** (1.43 - 3.97) |
|                     | 50 - 54     | 5.50*** (4.77 - 6.35) |                     |                     |                     |                     |                     |                     |                     | 2.45*** (1.47 - 4.09) |
|                     | 55 - 59     | 5.39*** (4.53 - 6.40) |                     |                     |                     |                     |                     |                     |                     | 2.55*** (1.52 - 4.29) |
|                     | 60 - 64     | 5.52*** (4.22 - 7.21) |                     |                     |                     |                     |                     |                     |                     | 2.70*** (1.54 - 4.74) |
|                     | 65 - 69     | 2.77* (1.25 - 6.12)   |                     |                     |                     |                     |                     |                     |                     | 1.47 (0.58 - 3.76)    |
|                     | 70 - 74     | 4.39** (1.48 - 13.01) |                     |                     |                     |                     |                     |                     |                     | 2.35 (0.71 - 7.76)    |

|                             |                                                 |                         |                       |                       |                       |  |  |  |  |                       |
|-----------------------------|-------------------------------------------------|-------------------------|-----------------------|-----------------------|-----------------------|--|--|--|--|-----------------------|
|                             | 75 – 79                                         | 14.82*** (3.32 - 66.35) |                       |                       |                       |  |  |  |  | 7.96* (1.64 - 38.68)  |
| Gender                      | Male( ref.)                                     |                         |                       |                       |                       |  |  |  |  |                       |
|                             | Female                                          |                         | 1.37*** (1.31 - 1.44) |                       |                       |  |  |  |  | 1.04* (0.99 - 1.09)   |
| Residential Settlement Type | Rural town and fringe in sparse setting         |                         |                       | 0.51*** (0.41 - 0.64) |                       |  |  |  |  | 0.60*** (0.47 - 0.75) |
|                             | Rural village and dispersed                     |                         |                       | 0.90'                 |                       |  |  |  |  | 0.89' (0.79 - 1.01)   |
|                             | Rural village and dispersed in a sparse setting |                         |                       | 0.64*** (0.41 - 1.02) |                       |  |  |  |  | 0.69*** (0.60 - 0.81) |
|                             | Urban city and town                             |                         |                       | 1.16** (1.09 - 1.24)  |                       |  |  |  |  | 1.13*** (1.05 - 1.21) |
|                             | Urban city and town in a sparse setting         |                         |                       | 0.70** (0.54 - 0.89)  |                       |  |  |  |  | 0.79' (0.61 - 1.01)   |
|                             | Rural town and fringe (ref.)                    |                         |                       |                       |                       |  |  |  |  |                       |
| School Type                 | Primary (ref.)                                  |                         |                       |                       |                       |  |  |  |  |                       |
|                             | Middle                                          |                         |                       |                       | 1.04 (0.94 - 1.16)    |  |  |  |  | 0.60*** (0.53 - 0.69) |
|                             | Nursery or PRU                                  |                         |                       |                       | 0.33* (0.14 - 0.82)   |  |  |  |  | 0.42' (0.17 - 1.03)   |
|                             | Secondary                                       |                         |                       |                       | 1.47*** (1.40 - 1.54) |  |  |  |  | 0.81*** (0.74 - 0.89) |
|                             | Special                                         |                         |                       |                       | 1.78*** (1.58 - 2.02) |  |  |  |  | 0.81** (0.69 - 0.95)  |

|                                    |              |  |  |  |  |                          |                          |                          |                          |                          |
|------------------------------------|--------------|--|--|--|--|--------------------------|--------------------------|--------------------------|--------------------------|--------------------------|
| School relation                    | Pupil (ref.) |  |  |  |  | 2.74***<br>(2.60 - 2.88) |                          |                          |                          | 2.72***<br>(1.77 - 4.69) |
|                                    | Staff        |  |  |  |  |                          |                          |                          |                          |                          |
| Number of staff within school      |              |  |  |  |  |                          | 1.01***<br>(1.01 - 1.01) |                          |                          | 1.00** (1.00 - 1.00)     |
| Number of pupils within the school |              |  |  |  |  |                          |                          | 1.01***<br>(1.01 - 1.01) |                          | 1.00***<br>(1.00 - 1.00) |
| Number within household            |              |  |  |  |  |                          |                          |                          | 1.26***<br>(1.24 - 1.28) | 1.35***<br>(1.33 - 1.38) |

Table S3 – Odds ratios of fully-adjust models. Signif. codes: 0 '\*\*\*' 0.001 '\*\*' 0.01 '\*' 0.05 '.' 0.1 ' ' 1.

| Exposure variable (within last 14 days)                              | M1 Staff and Pupil Outcomes (n = 83,004) | M2 – Staff Outcomes (n = 13,543) | M3 – Pupil Outcomes (n = 69,461) |
|----------------------------------------------------------------------|------------------------------------------|----------------------------------|----------------------------------|
| Count of cases within own household                                  | 11.81***<br>(11.02 – 12.15)              | 39.86***<br>(35.01 – 45.38)      | 9.39***<br>(8.94 – 9.88)         |
| Count of staff member cases within the linked school                 | 0.93***<br>(0.89 – 0.97)                 | 0.92'<br>(0.85 – 1.00)           | 0.97<br>(0.91– 1.01)             |
| Count of pupil cases within the linked school (non-year for M3)      | 0.97***<br>(0.95 – 0.98)                 | 0.98<br>(0.93 – 1.02)            | 0.92***<br>(0.89 – 0.94)         |
| Count of pupil cases in the linked school within the same year group | -                                        | -                                | 1.12***<br>(1.08 – 1.15)         |
| Count of cases in staff member's homes linked to the school.         | 1.11***<br>(1.07 – 1.15)                 | 1.09**<br>(1.02 – 1.17)          | 1.17***<br>(1.12 – 1.22)         |

| Count of cases in pupils' homes linked to the school. |             | 1.07***<br>(1.06 – 1.09) | 1.04*<br>(1.01 – 1.07)   |                     |                  | 1.08***<br>(1.06 - 1.10) |
|-------------------------------------------------------|-------------|--------------------------|--------------------------|---------------------|------------------|--------------------------|
| Confounder Variable                                   | Category    |                          |                          | Pupil only category |                  |                          |
| Age Group                                             | 0 - 4 (ref) |                          |                          | Year Group          | Below Year 1     | 0.33***<br>(0.26 - 0.47) |
|                                                       | 5 - 9       | 1.47***<br>(1.30 - 1.66) | -                        |                     | Year 1           | 0.42***<br>(0.29 - 0.60) |
|                                                       | 10 - 14     | 2.75***<br>(2.37 – 3.19) | -                        |                     | Year 2           | 0.49***<br>(0.34 - 0.70) |
|                                                       | 15 - 19     | 3.91***<br>(3.15 – 4.84) | -                        |                     | Year 3           | 0.50***<br>(0.35 - 0.72) |
|                                                       | 20 - 24     | 1.88<br>(0.99 – 3.56)    | 0.45*<br>(0.23 - 0.92)   |                     | Year 4           | 0.55***<br>(0.38 - 0.78) |
|                                                       | 25 - 29     | 1.68<br>(0.90 – 3.11)    | 0.43*<br>(0.22 – 0.85)   |                     | Year 5           | 0.56**<br>(0.40 - 0.81)  |
|                                                       | 30 - 34     | 1.43<br>(0.77 – 2.65)    | 0.35**<br>(1.78 – 0.69)  |                     | Year 6           | 0.61**<br>(0.43 - 0.86)  |
|                                                       | 35 - 39     | 1.28<br>(0.69 – 2.38)    | 0.29***<br>(0.15 – 0.57) |                     | Year 8           | 0.68**<br>(0.59 - 0.79)  |
|                                                       | 40 - 44     | 1.37<br>(0.74 - 2.54)    | 0.30***<br>(0.16 – 0.60) |                     | Year 9           | 0.75***<br>(0.65 - 0.87) |
|                                                       | 45 - 49     | 1.56<br>(0.85 - 2.89)    | 0.34**<br>(0.18 – 0.67)  |                     | Year 10          | 0.85*<br>(0.74 - 0.98)   |
|                                                       | 50 - 54     | 1.75'<br>(0.95 - 3.24)   | 0.41**<br>(0.21 – 0.79)  |                     | Year 11<br>(ref) | -                        |
|                                                       | 55 - 59     | 1.83'<br>(0.98 – 3.41)   | 0.44*<br>(0.22 – 0.87)   |                     |                  |                          |
|                                                       | 60 - 64     | 1.77.<br>(0.91 – 3.45)   | 0.47<br>(0.22 – 0.98)    |                     |                  |                          |

|                             |                                                 |                          |                         |  |                         |
|-----------------------------|-------------------------------------------------|--------------------------|-------------------------|--|-------------------------|
|                             | 65 – 69                                         | 0.95<br>(0.33 – 2.71)    | 0.25*<br>(0.08 – 0.82)  |  |                         |
|                             | 70 – 74                                         | 1.46<br>(0.37 – 5.73)    | 0.38<br>(0.07 – 1.83)   |  |                         |
|                             | 75 – 79                                         | 4.60<br>(0.71 – 29.91)   | 1.00<br>(0.11 – 9.44)   |  |                         |
| Gender                      | Male (ref.)                                     |                          |                         |  |                         |
|                             | Female                                          | 0.97<br>(0.90 – 1.03)    | 0.85<br>(0.70 – 1.02)   |  | 0.98<br>(0.92 – 1.06)   |
| Residential Settlement Type | Rural town and fringe in sparse setting         | 0.65**<br>(0.49 – 0.86)  | 0.50*<br>(0.26 – 0.96)  |  | 0.73*<br>(0.53 – 1.00)  |
|                             | Rural village and dispersed                     | 0.86'<br>(0.73 – 1.02)   | 0.79<br>(0.57 – 1.09)   |  | 0.90<br>(0.54 – 0.90)   |
|                             | Rural village and dispersed in a sparse setting | 0.64***<br>(0.52 – 0.79) | 0.51**<br>(0.34 – 0.77) |  | 0.70**<br>(0.54 – 0.90) |
|                             | Urban city and town                             | 1.04<br>(0.95 – 1.13)    | 1.00<br>(0.83 – 1.20)   |  | 1.04<br>(0.94 – 1.15)   |
|                             | Urban city and town in a sparse setting         | 0.72*<br>(0.52 – 0.99)   | 0.51<br>(0.23 – 1.14)   |  | 0.79<br>(0.55 – 1.13)   |
|                             | Rural town and fringe (ref.)                    |                          |                         |  |                         |
| School Type                 | Primary (ref.)                                  |                          |                         |  |                         |
|                             | Middle                                          | 0.65***<br>(0.54 – 0.78) | 0.62*<br>(0.41 – 0.93)  |  | 0.75'<br>(0.54 – 1.04)  |
|                             | Nursery or PRU                                  | 0.56<br>(0.19 – 1.66)    | 0.43<br>(0.05 – 3.94)   |  | 0.80<br>(0.23 – 2.76)   |
|                             | Secondary                                       | 0.80***<br>(0.71 – 0.91) | 0.82'<br>(0.65 – 1.03)  |  | 0.90<br>(0.64 – 1.27)   |
|                             | Special                                         | 1.10                     | 1.00                    |  | 0.98                    |

|                                    |              |                          |                          |  |                          |
|------------------------------------|--------------|--------------------------|--------------------------|--|--------------------------|
|                                    |              | (0.90 – 1.33)            | (0.75 – 1.35)            |  | (0.66 – 1.45)            |
| School relation                    | Pupil (ref.) |                          | -                        |  | -                        |
|                                    | Staff        | 2.99***<br>(1.70 - 5.37) | -                        |  | -                        |
| Number of staff within school      |              | 1.00**<br>(1.00 – 1.00)  | 1.00<br>(0.99 – 1.00)    |  | 1.00<br>(1.00 – 1.00)    |
| Number of pupils within the school |              | 1.00*<br>(1.00 – 1.00)   | 1.00<br>(1.00 – 1.00)    |  | 1.00*<br>(1.00 – 1.00)   |
| Number within household            |              | 0.64***<br>(0.61 - 0.65) | 0.65***<br>(0.61 – 0.70) |  | 0.65***<br>(0.63 – 0.68) |

| Missing variable                    | Total number of individuals with missing variable |
|-------------------------------------|---------------------------------------------------|
| Residential Anonymous Linking Field | 4,778                                             |
| Residential Settlement Type         | 5,587                                             |
| School Type                         | 350                                               |
| Number of staff within the school   | 842                                               |
| Number of pupils within the school  | 189                                               |
| Other (data linkage issue)          | 1,508                                             |

Table S4 – Number of individuals with missing variables at the individual-level (in the Welsh COVID-19 e-cohort) before being confirmed eligible for the modelling cohort. Note this is not a count of distinct individuals, multiple persons may have multiple missing variables.
